# Supplementary material for: Comparative Accuracy of In Vitro Rumen Fermentation and Enzymatic Methodologies for Determination of Undigested Neutral Detergent Fiber in Forages and Development of Predictive Equations Using NIRS
Source: MDPI journal article supplement (doi:10.3390/agriculture12111914), 2022-11-14
Supplement: s1 [file s1]

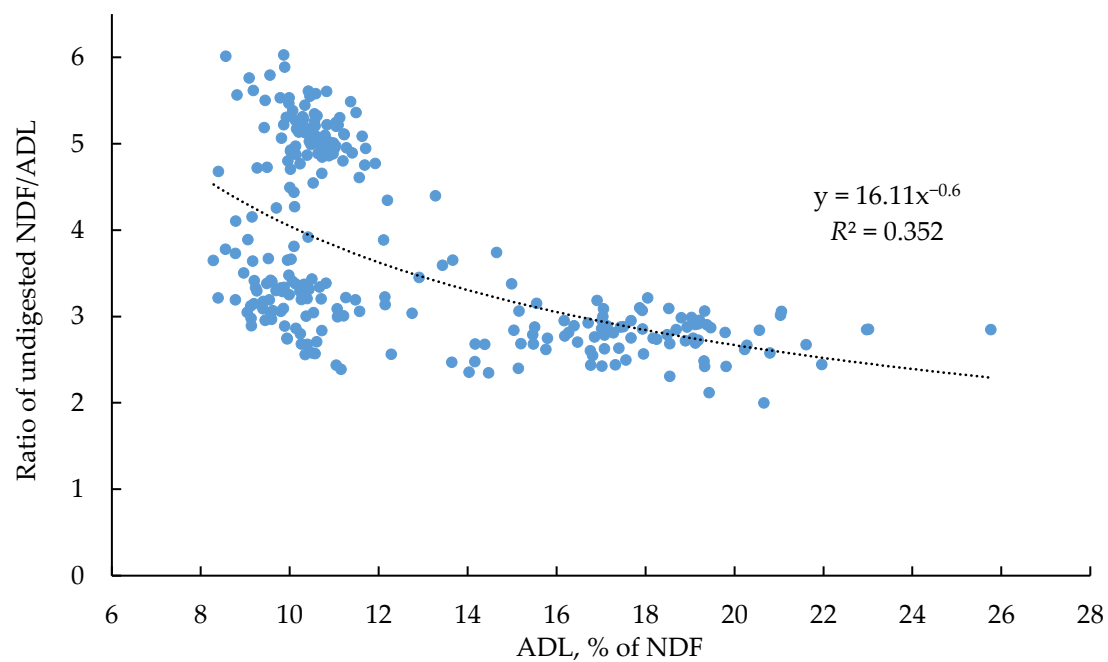

**Supplementary Figure S1.** Ratio of undigested NDF/acid detergent lignin (ADL) versus ADL/neutral detergent fiber (NDF) using a pool of alfalfa hay, timothy hay, and tall fescue straw ( $n = 264$ ).
